# Supplementary material for: aBravo Is a Novel Aedes aegypti Antiviral Protein That Interacts with, but Acts Independently of, the Exogenous siRNA Pathway Effector Dicer 2
Source: MDPI journal article supplement (doi:10.3390/v12070748), 2020-07-11
Supplement: s1 [file s1]

>Q17D57 gene sequence from Aag2 cells

ATGTCCCATTTCCACCTACAACCTGTTTCGCTTTTCGGCTCAATGAGATTATCGATGACTATCTCCAGCGAGTCAAC  
TGGATCTACGAGGGCGCCGTCCCGGAGATCGATCACCTGTTGGAGGCGATCGATTCCACtCTGTTTCAAGCAGCA  
TGTGTCCAGCCCCGAATCGCTGGTATTTCGGAGATATTAGTCTTGTCTGGGACATTGTGCGGTTTTTTTGAACCGAT  
CCAGTGCTGTGGGAAAAGCCTCTTGAACAGCGACACGCTGATGGTGCACTTGTATGCATCACGCCGCCGATGAAC  
GGGAAGAACTGGACAGTGGCACTAAGCGCACGGCCATTCTCTTCAAtCTTGTTCGTCCAACCTTGGCACGGGTATT  
CTTGACCGCTACGACAACAACCTACGACCAGATTGAGCAATACACCGCTCAACTGCTGCGCAAGGCATCCGAATAC  
CTAAGCTGCATTCTGCGGCAAGCCGATCCGAGGAGATGCCctAGGCTGCGGTCACCTTCATCGAGAATGTCACCT  
TTGCCAAGTGGAAGTACGTGTTTCGACTACACGTGCATCCCGTGTACCAACAGGGGAATCGACAACCTGCCGCTACG  
AGGATGCAATCGCATGGTACAAAATCCACCTCAACACGATGGGGTCCAACCCGATTCGCCACCTGGGCACCAAGA  
TGCATGGAGTAAGCCTTCGGGATTGTTTGGGGGATCGCGTTGTTGCACCAACTCCTTCGGTGATTTCGGGAGGTTT  
GACCAAGTCCCCAGCTgCTCCACGGCTACCAAaGTACCTCATGGAGGTCCGTGAAAGCGAGCTGGACAAGCTTTG  
CACGATCGGAACGGCAGTTCAACGGAACACGCCTTACCAAGCCGTCAGAGCTTATCTTCAGGCGAAACTAGGATC  
TATTCTCAAGAGGAGCACCATCGAACCATTTCGGCTCGCGAGTAAGTGCgAGTAGCCAATCAGAATTTCGGATCTTG  
ATCTGGCCATCAAAGTGATCCTAGCATGCAACCGAAAACTGCCTACCAAAAAAGTTCTTGATGGGCCAGAGCAA  
ACaGATCATGGAAGTGcAATGTAGAACGTGAGATCCCTGACGGACCTTTGGTTCTTCGCTTGAGATTTCATTCCC  
TGCAATTGATCGTGACCTTACGTTCAACAGCCCCATACGTGGTTGGTAATGCAAAGATCATTGACTACTTCTACC  
GACTTCAACCGATGGCCCCGAAACTATTCTTCTTGCTCAAGGAATGGAAGAAGCGAACTGATATCGGCAAGAACT  
TaCCACCACAATGTCTAACTTCCATGATCGTATTCTACATGCAAAACGGAACAGTATCTTCCCCCAATCACTCCG  
CTGATCAACGGTCCCCAAAAGGTCAACGCCTTATACAACACGGAATTCGTTGAGCTCATCACCTGTATCGACTT  
CCGAACAGCTTTCTGGCCCTCGTAAAAGACTTCTTCACCTATTGGTCTCGCTTCGATTGGGCCCCGTACCGGTGCA  
TCGGTCAAGGACGCCAGAGTCCGACCCAGAAGCACCTTCCGACAATGTGCGCAACCCGACCCAGCCGATGATGAT  
AACGGATTATTTTCGACGTTACTCGCAACGTGGCCGGAATGTGCCCCAGGGGACTGCGAGAAGTTTGTCCGGGC  
CTGCAAAGAGGCAGCAGGCGCTCTGAAGGCCAAACAGACCATCTGA

>Q0IFK9 gene sequence from Aag2 cells

ATGTCTGAAACCGAGAGAAGAAAGCAGAAACATCTACCGAGGAGAAACCGAGACCGACGGCCCAAAGCCTGATGCTGAGCATCA  
ACGCAAGATCAATGTCGCTAACTTGCCGTGGGACGTAACCTGAGCAGCAGTTGCGCGATTGTTTCAGCGGTTCATGAGGTCGAGA  
AGGTGGAGATCTACCATTACCGCAAGTACACGCTGGCCTTGGTCCTGTTCAAGGACAAGGACACCGCTGCCGCGGCTCTgGCC  
GAAAAGGAGAACTCTATGTTCCGCGATCGCCGTCTTCGTATGCACATGGAATTCACCTCAATCCGCCATATCAAGCGTGAAGT  
CATTGTTACCGTCTGTTGAAGATGAGAACATGACCGAAGAGCAGCTGTGGGATAAGGTTAAGGCAGCTGGCGTGGAACCGACTT  
CGGTGTTGATCTTCTATCCATTGGGCTATGTTACTTTGGAGAAGGAATGCGACAAGGCcCCTATTCTTGAGAACTGAAGGCC  
GCTGGATTCAATGCGCATGACTTGAACCAACGTGACCAGAACCAGCATTGGACATCTGGCGTGCGGCCAACTGTTCTTCCG  
TAACCGCAACCGtGTCCAGCTGTTGAACATTCCCAACAAGTGGATTGAAGATAAGGAAGAGATGAAGAAACAATGCGCTGAAG  
GAGGTACCATTAACGAAGCTGTTTCGAACAATGTTACCCAAAATCCCCAGATGGCTTCCAACCTATGCCCCGAATCTTCTACGAA  
ACTGAAGAGCAGGCCGTCAAGGCTGCAAAGGCTCTGAATGGACGCGTTGTTGATGGCAAGCGTATCCATGCTCTGCATCTGGG  
ATCCGCATTGATGCCAACTACAAGACCTCGGTCTACGTTACGTCTTTGGACAAGGGTGTACTGAAGAGCAAGTTTATGATC  
ATTTCAAGCAGTTTGGCGAATTTGAGTTCACCAACCTGCGCAACTGTGGAGATGCTGCTATCATCTGCTACAAGAACGCTGCT  
TCCGCTGAGAAAGCGCTTGCAATGCACCCTTCCCGCGCCTACCAGAAGAGAACAAGGATGCTACCAAGGAGGTTGTTGTCAA  
GAAATACGACGACCATTTGGTCCTTCGTCCGTTGCCCTGAAGCGTAAATTGAAGGCCGAGAGAAGAAGAGAAGGATCAGGCCG  
AAAAGACCAAGGAGCAACAAAGTGTGCTCGGAAAGCTGAAGGCTTACCACCCGATCTTTGTGCGGCAACGTGCCACTGAATTGC  
CCACCTTTGGAATTGAAGCACTACTTTGCGCAGCACGGACCAATCAAGTTCATGTTCTCGCCGCAAATCTTGGCTTACCGCAA  
CAGCGCGCCTCACCCCGTGAAGACGTTTATCATCTACTACATGAACCGTCCGAGCCAGCAGAATGCCGTTTCGCTTCTTCGACC  
ACAAGTCTTTCGGTGGTACCCTGCTGCATGTGCTGCCACTGCGCGGAACACAAAACATGGATGTCAAGAAGACCATCAAGATG  
ACCAAGATTCCATTTCATGTCCGAGGATGCGTTGTTCAAGAAGATCAAGCCATTTCGTTGGCAAGATCAACCGCATCGTGAAGAA  
GTCGCGATTGATAGCTTACATTGAGCTGGAAGACAGCGCCGACGTCGAGAAAAATGATGAACGTTGAAACCCCTGACCATCCTC  
TGCCAAAGGGTAAGATGGAACAGCTCAAGACCCCAATCAGCGCTCGTCTGTACAATGAGGACGATGTTTCGTGATTGAACGGC  
ATCGCCAAGATTGTCGCCAAGAACCCGGATATGCTGAAGAAGAACATTACGCCACCCAAACAGCGTCCACGCATGGAGTTTCGG  
TGGTCCAGGTTTTAATCAAGGCCCTGGAGGCTTCGTTCCCAATAACAATATGAACAATCCAAATGCTATCCAAGATTGTTGTC  
GTCTTGCGTTTCATGCTCCGGCAAGAACGTTGGCGAGAGTCTGGCTTCTAACCCAGAGCTCGTTCCGACCCGACCCACCATGCGC  
AATTCCAACAACCTTTGGTGACGGTGGTTTCGGTAACCGTAACCGCAATAACCAAGGTGGTAATCAAGGCAACTTCCGTGGTCA  
AGGAAGAATGAACATGAACCAAGATCAGAACCGTGGCAACAATGCCAACAATTTTCGGTGGCAACACAAATGCCGGTGGTAACA  
ACTTCCAAGCTTCCCCCGGAAATCAAAACCGTGGTGGACAAAACATGAATCGTGGTAATCAACAGAACCAGAACCCTGCTGGT  
GGTAACATGAACCAAGGCAACAACATGAATCAGGCCGCGCGCGGAAATGTTAATCGCCCTCAGCAAAATAAGCCAATGAACAT  
GAATACCGGTAACCAAAATCAAAATAGAAACAACAGGTTGGTGGCGCGGCAATATGAACCGCAACCAAAACCAAAATAACC  
GCAACAACCTTCGACAATGACAATTCCTTTGGCGGAGGAACAACCTTTGGCAACAACCGCAACAACAATTTTCCAATGACAGT  
TTTGGTAGCAACGATAATAACTTTGGTGGTAACAATAGTGGTAGTAACAACCTTCTCGAATGACAACAACCTTCGGTGGTAATAA  
CCGTGGTAACAACCTTCGGTGGTAACAAGCGCAACAGGATAACTTTAATAACTCGTTCGGTAGCGGAAACAACAGCGGTG  
GAAACAATCGCTTCAATAACGATGGAACAATTTCAATAGCAATTTTAAACAACCGCAACCAAAACAATCGTTTTGACAACGAC  
AACGATAACAATTTTACTGGTAATAAGGGTGGTAACAATTTTCGGCAACCGTCAAAACAAGCCCTTCAATCAGGGAAACAATCA

GGGTGGCAACCAGGGAGGCGGTATGTCCTTTGGTGAATTTAACAACCTCCAATTCCTCCAACCGTAGTGGTGGAACTTCGGTG  
GAAACAATTCCGGTTTCAATTCTGGCAACGCCGGAGGAAACAAGTGGAACAACAATTCCTCAGCAATCCAATACTGGCAGCCGC  
CTCGCTGGTAGCATTTTTAGCCGACGCTTCTAA
